# Supplementary material for: Mobile Phone Surveys for Collecting Population-Level Estimates in Low- and Middle-Income Countries: A Literature Review
Source: PubMed Central journal article supplement (PMC5438460; doi:10.2196/jmir.7428), 2017-05-05
Supplement: jmir_v19i5e139_app1.pdf [file jmir_v19i5e139_app1.pdf]

Appendix 1. Example of search terms used

((“cell phone” OR “mobile phone”) AND (survey OR questionnaire\* OR “data collection”)) OR

((“IVR” OR “interactive voice response”) AND (survey OR questionnaire\* OR “data collection”)) OR

((“SMS” OR “short message service” OR (text AND message\*)) AND (survey OR questionnaire\* OR “data collection”))
